# Supplementary material for: Expression of Luteinizing Hormone-Releasing Hormone (LHRH) and Type-I LHRH Receptor in Transitional Cell Carcinoma Type of Human Bladder Cancer
Source: MDPI journal article supplement (doi:10.3390/molecules26051253), 2021-02-26
Supplement: s1 [file s1]

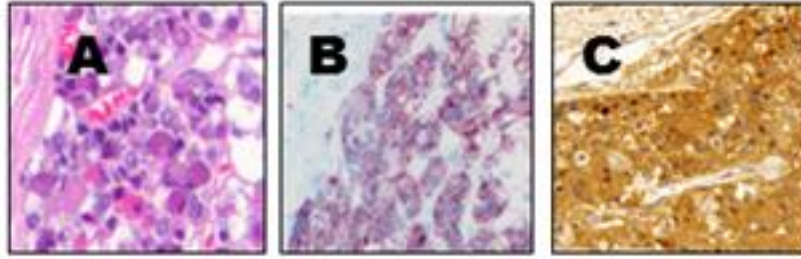

**Figure S3. Representative positive control images for IHC obtained from a normal human pituitary gland.** Representative positive control images for IHC obtained from a normal human pituitary stained with HE. **(A)** The endocrine cells of the adeno-hypophysis region (right) are typically expressed the common marker synaptophysin **(B)** purple cells using VIP chromogen) and LHRH-R protein **(C)** brown cells using DAB chromogen, respectively while the neuro-hypophysis parts (left) are non-reactive for these proteins. Magnifications for all images: 150x. To check the specificities for the primary antibodies, each IHC reaction included negative control where the primary antibody was replaced with an isotype-specific normal immunoglobulin which did not give positive staining.
