# Supplementary material for: Expression of Luteinizing Hormone-Releasing Hormone (LHRH) and Type-I LHRH Receptor in Transitional Cell Carcinoma Type of Human Bladder Cancer
Source: MDPI journal article supplement (doi:10.3390/molecules26051253), 2021-02-26
Supplement: s1 [file s1]

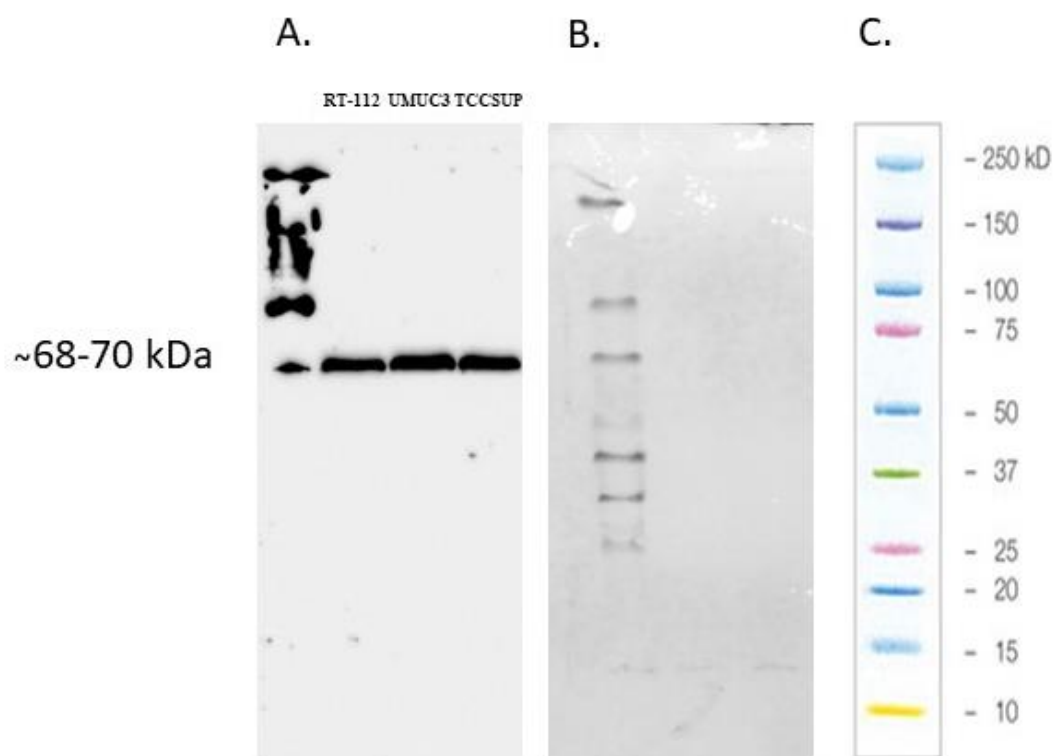

**Figure S4. Chemiluminescence detection of LHRH-receptor protein in human bladder cancer cell lines. (A)** Chemiluminescence detection of LHRH-receptor protein in human bladder cancer cell lines (RT-112, UMUC3, TCCSUP). **(B)** Image of membrane with visualized marker used for 10 %SDS –PAGE (Precision Plus Protein™ Kaleidoscope™ Prestained Protein Standards #1610375). **(C)** Picture of Kaleidoscope standard # 1610375 provided by the manufacturer (BIORAD).
