# Supplementary material for: Expression of Luteinizing Hormone-Releasing Hormone (LHRH) and Type-I LHRH Receptor in Transitional Cell Carcinoma Type of Human Bladder Cancer
Source: Molecules. 2021 Feb 26;26(5):1253. doi: 10.3390/molecules26051253 (PMC7956722; doi:10.3390/molecules26051253)
Supplement: Supplementary file 1 [file molecules-26-01253-s001.zip]

Archive with 4 entries (4 files):
- Szabo et al Figure S1.pdf
- Szabo et al Figure S2.pdf
- Szabo et al Figure S3.pdf
- Szabo et al Figure S4.pdf
